# Supplementary material for: Changes in Choline Metabolites and Ceramides in Response to a DASH-Style Diet in Older Adults
Source: MDPI journal article supplement (doi:10.3390/nu15173687), 2023-08-23
Supplement: s1 [file s1]

**Table S1:** Correlations between plasma choline, betaine, PC, L-carnitine, TMAO, sphingomyelins, ceramides, and LPCs with body composition, cardiometabolic, and inflammatory markers

| Anthropometric, muscle, cardiometabolic, and inflammatory markers |       |       |       |       |               |           |       |       |         |      |         |         |       |       |  |
|-------------------------------------------------------------------|-------|-------|-------|-------|---------------|-----------|-------|-------|---------|------|---------|---------|-------|-------|--|
| Variable                                                          | BW    | BMI   | SMM   | % BF  | Grip strength | Myostatin | TC    | LDL-C | Glucose | TG   | Insulin | HOMA-IR | CRP   | IL-8  |  |
| Choline                                                           |       |       |       | -0.44 |               |           |       |       |         |      |         |         |       |       |  |
| Betaine                                                           |       |       |       | -0.49 |               |           |       |       |         |      |         |         |       |       |  |
| PC                                                                |       |       | -0.42 |       |               |           |       |       |         |      |         |         |       |       |  |
| L-Carnitine                                                       |       |       |       |       |               |           |       |       | -0.49   |      |         |         |       | 0.47  |  |
| TMAO                                                              |       |       |       |       |               |           |       |       |         |      | 0.51    | 0.50    |       |       |  |
| Sphingomyelins                                                    |       |       |       |       |               |           |       |       |         |      |         |         |       |       |  |
| 24:0                                                              |       |       |       |       |               |           | -0.42 | -0.49 | -0.63   |      |         |         |       | 0.74  |  |
| 24:1                                                              | -0.61 | -0.61 | -0.47 |       | 0.51          |           |       |       |         |      |         |         |       |       |  |
| Ceramides                                                         |       |       |       |       |               |           |       |       |         |      |         |         |       |       |  |
| C22:0                                                             |       |       |       |       |               |           | 0.44  |       |         |      |         |         |       |       |  |
| LPCs                                                              |       |       |       |       |               |           |       |       |         |      |         |         |       |       |  |
| 14:0                                                              |       |       |       |       |               |           |       |       |         |      |         |         |       | 0.44  |  |
| 15:0                                                              |       |       |       |       |               |           |       |       |         |      |         |         |       | -0.56 |  |
| 16:0                                                              |       |       |       |       |               | 0.48      |       |       |         |      |         |         |       |       |  |
| 16:1                                                              |       |       |       |       |               |           |       |       |         |      |         |         | -0.43 |       |  |
| 16:1e                                                             |       |       |       |       |               |           |       |       | 0.52    |      |         |         |       |       |  |
| 18:0                                                              |       |       |       |       |               |           |       |       | 0.42    |      |         |         | -0.45 |       |  |
| 18:1                                                              |       |       |       |       |               |           |       |       |         | 0.42 |         |         | -0.54 | 0.41  |  |
| 18:1e                                                             |       |       |       |       |               |           |       |       |         |      |         |         | -0.44 | 0.53  |  |
| 18:2                                                              |       |       |       | 0.41  |               |           |       |       |         |      |         |         | -0.39 |       |  |
| 18:3                                                              |       |       |       |       |               |           |       |       |         |      |         |         | -0.55 | 0.40  |  |
| 20:0                                                              |       |       |       |       |               |           |       |       |         |      |         |         | -0.57 | 0.55  |  |
| 20:1                                                              |       |       |       |       |               |           |       |       |         | 0.55 |         |         | -0.39 | 0.47  |  |
| 20:3                                                              |       |       |       |       |               |           |       |       |         |      |         |         | -0.44 | 0.37  |  |
| 20:4                                                              | 0.39  | -0.39 |       |       |               | -0.55     | -0.43 | -0.40 |         |      |         |         |       | 0.55  |  |
| 22:5                                                              |       |       |       |       |               |           |       |       |         |      |         |         | -0.52 |       |  |
| 26:0                                                              |       |       |       |       |               |           |       |       |         |      |         |         |       | 0.53  |  |

Relations were performed by Pearson's correlation coefficient. PC, phosphatidylcholine; TMAO, trimethylamine N-oxide. DMG, dimethylglycine; LPC, lysophosphatidylcholine; BW, body weight; BMI, body mass index; SMM, skeletal muscle mass; %BF, percent body fat; TC, total cholesterol; LDL-C, low-density lipoprotein cholesterol; TG, triglyceride; HOMA-IR, homeostatic model assessment for insulin resistance; CRP, C-Reactive Protein; IL-8, Interleukin-8.
